# Supplementary material for: Gestational Diabetes Mellitus and Infant Adiposity at Birth: A Systematic Review and Meta-Analysis of Therapeutic Interventions
Source: PubMed Central journal article supplement (PMC7922793; doi:10.3390/jcm10040835), 2021-02-18
Supplement: jcm-10-00835-s001.pdf [file jcm-10-00835-s001.pdf]

**Table S1.** Diagnostic Criteria for gestational diabetes mellitus (GDM) used by the studies included in the review.

| Criteria name                                                                  | Year | Screening oral glucose challenge test (OGCT)                                      |                              | Diagnostic oral glucose tolerance test (OGTT) |                  |            |                   |                                                  | Studies in the review                                                                              |                 |
|--------------------------------------------------------------------------------|------|-----------------------------------------------------------------------------------|------------------------------|-----------------------------------------------|------------------|------------|-------------------|--------------------------------------------------|----------------------------------------------------------------------------------------------------|-----------------|
|                                                                                |      | Dose                                                                              | 1 h mmol/L                   | Fasting mmol/L                                | Dose             | 1 h mmol/L | 2 h mmol/L        | 3 h mmol/L                                       |                                                                                                    | Abnormal values |
| O' Sullivan and Mahan [51]                                                     | 1964 | 50 g fasting                                                                      | 140                          | 5.0                                           | 100 g            | 9.2        | 8.1               | 6.9                                              | 2 or more                                                                                          | [18]            |
| White's Classification [52]                                                    | 1978 | Pregnant women are categorised according to duration and age of onset of diabetes |                              |                                               |                  |            |                   |                                                  |                                                                                                    | [17]            |
| US National Diabetes Data Group [53]                                           | 1979 | 50 g fasting                                                                      | 7.8                          | 5.8                                           | 100 g            | 10.5       | 9.1               | 8.0                                              | 2 or more                                                                                          | [6,29]          |
| Carpenter and Coustan [54]                                                     | 1982 | 50 g fasting                                                                      | 7.2                          | 5.3                                           | 100 g            | 10.0       | 8.6               | 7.8                                              | 2 or more                                                                                          | [19,21,25,30]   |
| Modified O'Sullivan Criteria by Court et al. [55]                              | 1985 | 50 g fasting                                                                      | 7.8                          | 5.8                                           | 100 g            | 10.0       | 8.9               | 7.8                                              | 2 or more                                                                                          | [20]            |
| European Association for the Study of Diabetes (EASD) [56]                     | 1991 | –                                                                                 | –                            | 7.0                                           | 75 g             | 11.0       | 9.0               | –                                                | Either the 0-h or 1-h concentration should meet or exceed stated values in addition to a 2-h value | [34]            |
| Australasian Diabetes In Pregnancy Society (ADIPS) [57]                        | 1998 | 50 g or 75 g non-fasting                                                          | 50 g: 7.8<br>or<br>75 g: 8.0 | 5.5                                           | 75 g             | –          | 8.0<br>or<br>9.0* | –                                                | 1 or more                                                                                          | [11,12,22,24]   |
| 4th International workshop conference [58]                                     | 1998 | 50 g fasting                                                                      | 7.2<br>or<br>7.8             | 5.3                                           | 100 g or<br>75 g | 10.0       | 8.6               | 7.8<br>(3 hr value<br>only<br>for 100 g<br>test) | 2 or more                                                                                          | [26]            |
| American Diabetes Association (ADA) [59]                                       | 2004 | 50 g fasting                                                                      | 7.2<br>or<br>7.8             | 5.3                                           | 100 g or<br>75 g | 10.0       | 8.6               | 7.8<br>(3 hr value<br>only<br>for 100 g<br>test) | 2 or more                                                                                          | [27,28]         |
| International Association of Diabetes and Pregnancy Study Groups (IADPSG) [60] | 2010 | –                                                                                 | –                            | 5.1                                           | 75 g             | 10.0       | 8.5               | –                                                | 1 or more                                                                                          | [31,33,35,36]   |
| World Health Organisation [61]                                                 | 2014 | –                                                                                 | –                            | 5.1–6.9                                       | 75 g             | 10.0       | 8.5–11.0          | –                                                | 1 or more                                                                                          | [32]            |

---

Guidelines are ordered according to the year of the publication. All values are for venous plasma glucose, except for O'Sullivan and Mahan criteria, which are venous whole blood glucose. IADPSG criteria are based on the Hyperglycaemia and Pregnancy Outcome (HAPO) study. OGCT: oral glucose challenge test; OGTT: oral glucose tolerance test.

| Step | Searches                                                                                                                                                                                                                                                                                                                                                                                                                                                                                                                                                                                                                                                          |
|------|-------------------------------------------------------------------------------------------------------------------------------------------------------------------------------------------------------------------------------------------------------------------------------------------------------------------------------------------------------------------------------------------------------------------------------------------------------------------------------------------------------------------------------------------------------------------------------------------------------------------------------------------------------------------|
| 1    | (gestation* or pregnan* or maternal or mother*).mp. [mp=title, abstract, original title, name of substance word, subject heading word, floating sub-heading word, keyword heading word, organism supplementary concept word, protocol supplementary concept word, rare disease supplementary concept word, unique identifier, synonyms]                                                                                                                                                                                                                                                                                                                           |
| 2    | (diabet* or hyperglyc?mi* or glycy?mi* or glucose intolerance or impaired glucose tolerance or insulin resistance).mp. [mp=title, abstract, original title, name of substance word, subject heading word, floating sub-heading word, keyword heading word, organism supplementary concept word, protocol supplementary concept word, rare disease supplementary concept word, unique identifier, synonyms]                                                                                                                                                                                                                                                        |
| 3    | (infan* or neonat* or child* or newborn* or offspring* or birth).mp. [mp=title, abstract, original title, name of substance word, subject heading word, floating sub-heading word, keyword heading word, organism supplementary concept word, protocol supplementary concept word, rare disease supplementary concept word, unique identifier, synonyms]                                                                                                                                                                                                                                                                                                          |
| 4    | ("body composition" or fat or adiposity).mp. [mp=title, abstract, original title, name of substance word, subject heading word, floating sub-heading word, keyword heading word, organism supplementary concept word, protocol supplementary concept word, rare disease supplementary concept word, unique identifier, synonyms]                                                                                                                                                                                                                                                                                                                                  |
| 5    | ("air-displacement plethysmography" or "isotope dilution" or "deuterium dilution" or "bioelectrical impedance" or "total body electrical conductivity" or "dual-energy x-ray absorptiometry" or "photon-counting computed tomography" or "photon absorptiometry" or "total body potassium" or "magnetic resonance imaging" or "skinfold" or "skin fold" or anthropometry).mp. [mp=title, abstract, original title, name of substance word, subject heading word, floating sub-heading word, keyword heading word, organism supplementary concept word, protocol supplementary concept word, rare disease supplementary concept word, unique identifier, synonyms] |
| 6    | 1 and 2 and 3 and 4 and 5                                                                                                                                                                                                                                                                                                                                                                                                                                                                                                                                                                                                                                         |
| 7    | limit 6 to (english language and humans and "all infant (birth to 23 months)")                                                                                                                                                                                                                                                                                                                                                                                                                                                                                                                                                                                    |

**Figure S1.** Search strategy in Medline via Ovid.

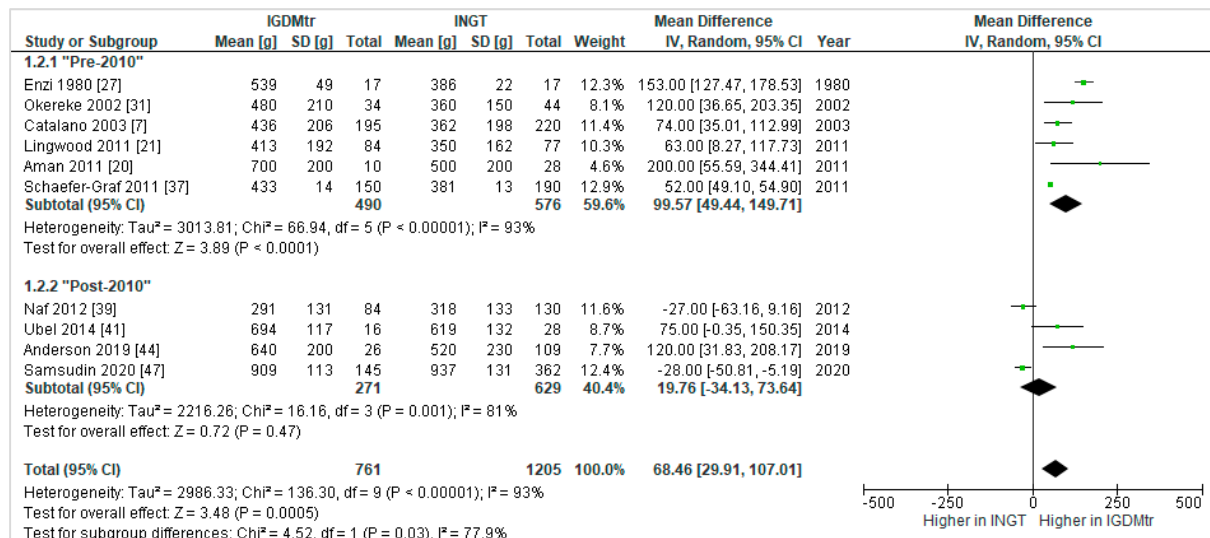

**Figure S2.** Forest plot comparing fat mass (g) in infants exposed to treated gestational diabetes mellitus (IGDMtr) and infants exposed to normal glucose tolerance (INGT) by subgroup analysis of time of the study; ‘pre-2010’ vs. ‘post-2010’.

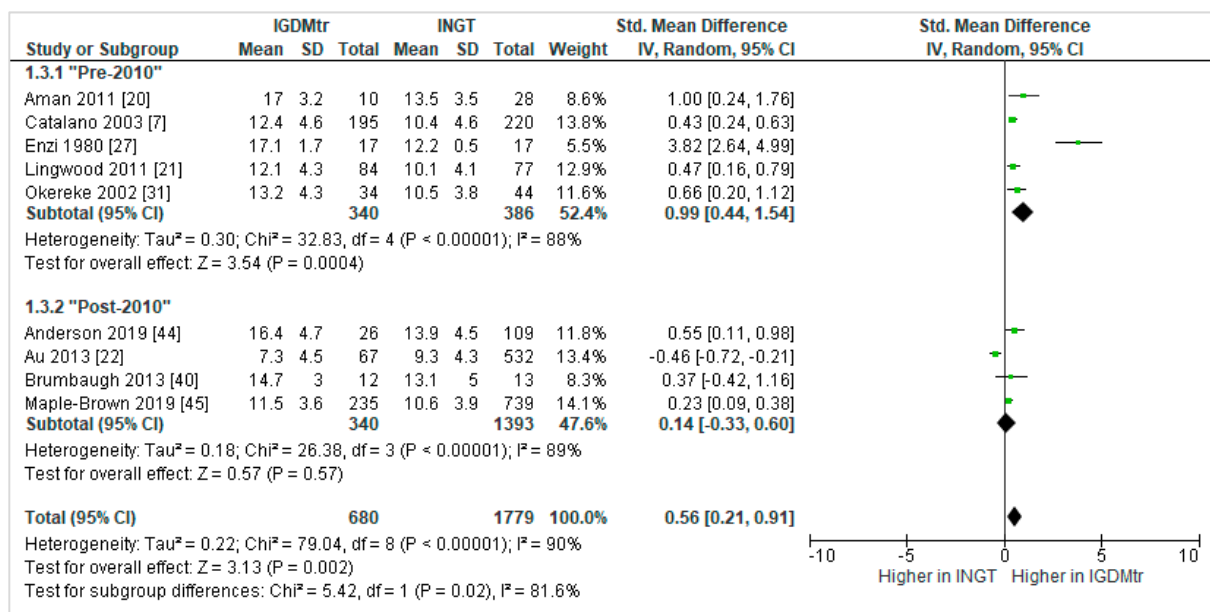

**Figure S3.** Forest plot comparing percent fat mass (%) in infants exposed to treated gestational diabetes mellitus (IGDMtr) and infants exposed to normal glucose tolerance (INGT) by subgroup analysis of time of the study; ‘pre-2010’ vs. ‘post-2010’.

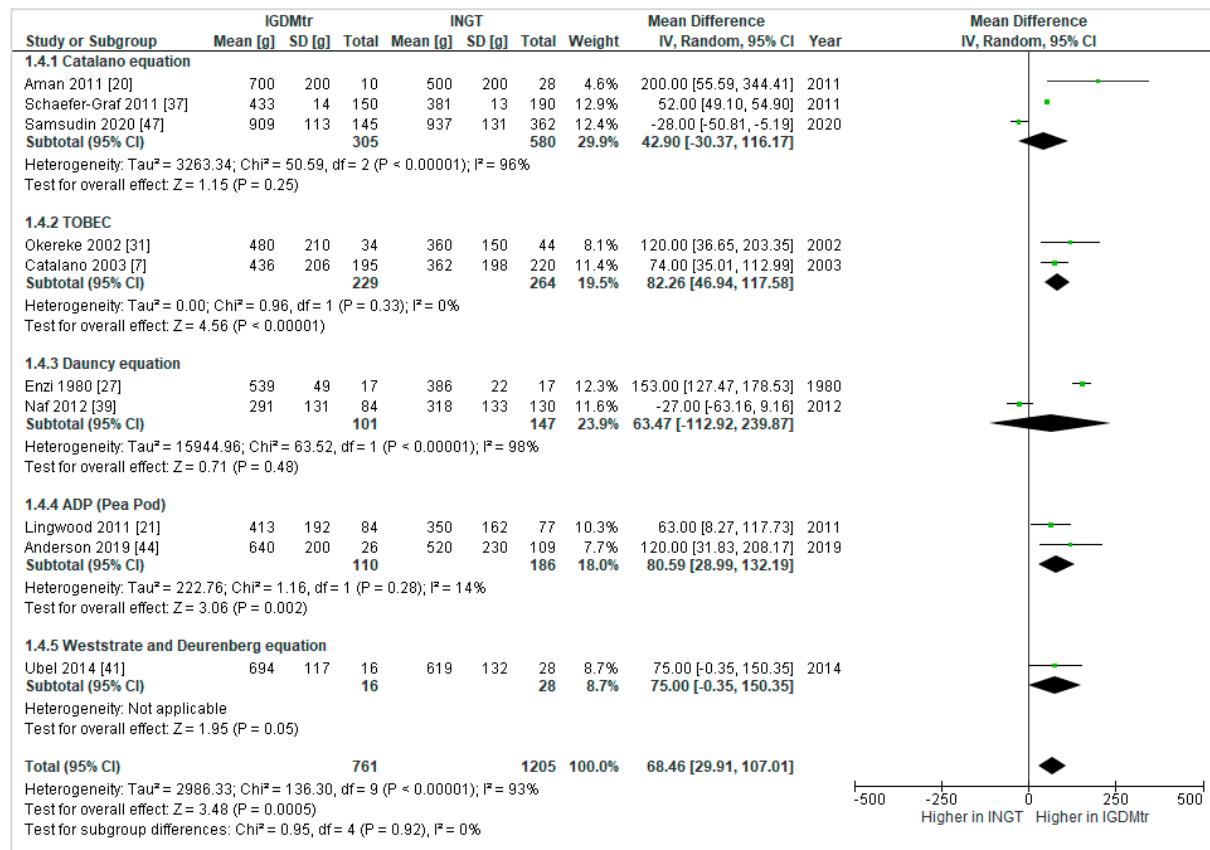

**Figure S4.** Forest plot comparing fat mass (g) in infants exposed to treated gestational diabetes mellitus (IGDMtr) and infants exposed to normal glucose tolerance (INGT) by subgroup analysis of infant body composition assessment technique.

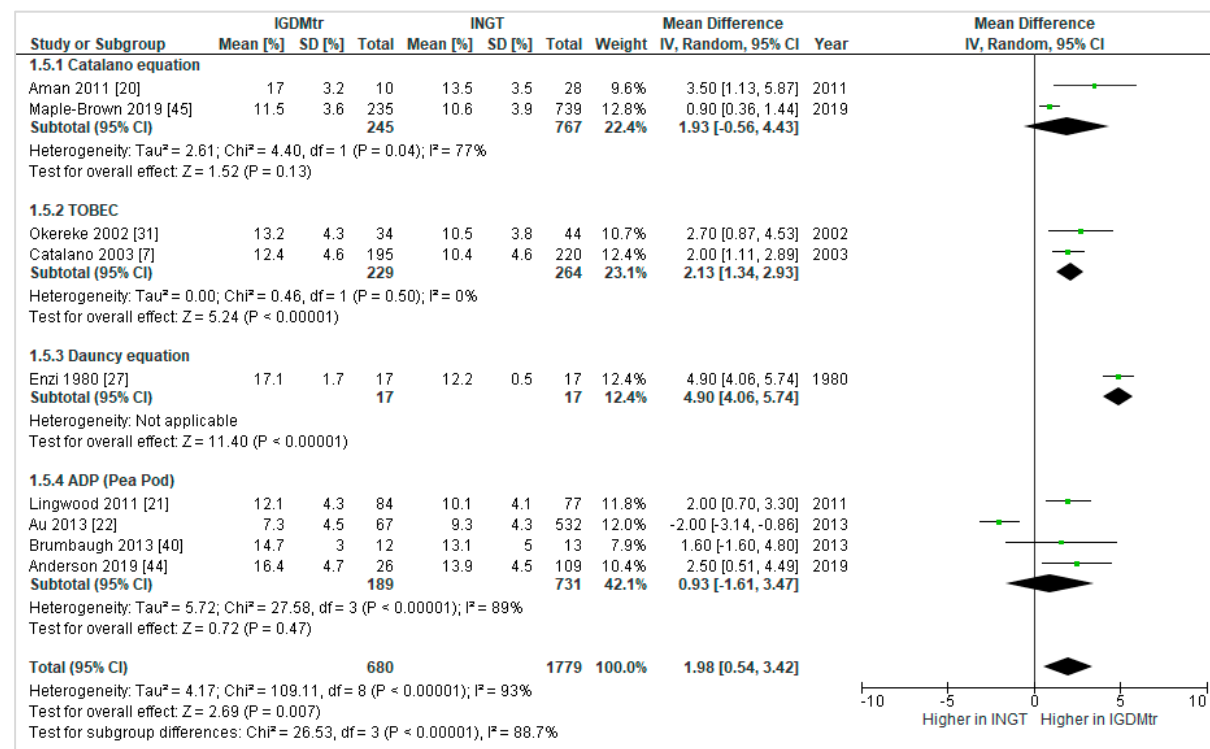

**Figure S5.** Forest plot comparing percent fat mass (%) in infants exposed to treated gestational diabetes mellitus (IGDM) and infants exposed to normal glucose tolerance (INGT) by subgroup analysis of infant body composition assessment technique.

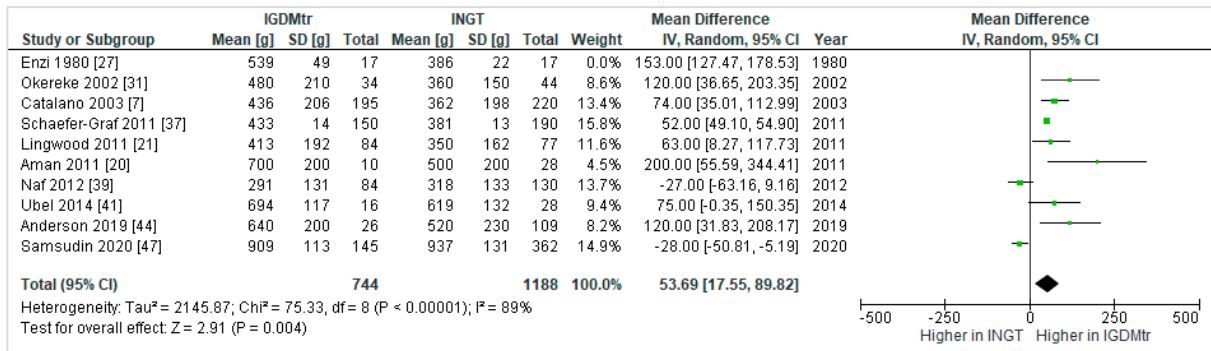

(a)

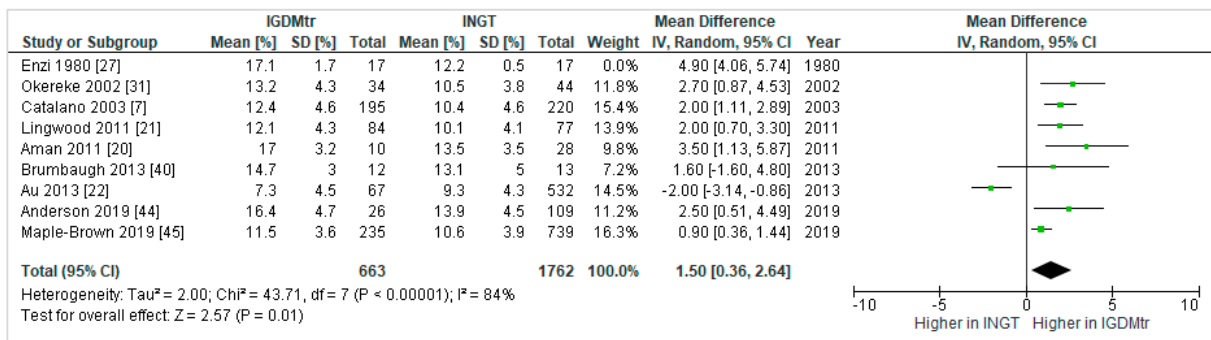

(b)

**Figure S6.** Forest plot comparing fat mass (a) and percent fat mass (b) in infants exposed to treated gestational diabetes mellitus (IGDM) and infants exposed to normal glucose tolerance (INGT) excluding the effect by the study (Enzi 1980) that used White’s classification for diagnosis of gestational diabetes.

## Reference

- O'Sullivan, J.B.; Mahan, C.M. CRITERIA FOR THE ORAL GLUCOSE TOLERANCE TEST IN PREGNANCY. *Diabetes* **1964**, *13*, 278-285.
2. Stevenson, D.K.; Ochikubo, C.G.; Rodgers, P.A.; Kerner, J.A., Jr. Anthropometry and bilirubin production. *J Perinatol* **1991**, *11*, 340-342.
  3. White, P. Classification of obstetric diabetes. *Am J Obstet Gynecol* **1978**, *130*, 228-230, doi:10.1016/0002-9378(78)90373-3.
  4. Enzi, G.; Inelmen, E.M.; Caretta, F.; Villani, F.; Zanardo, V.; DeBiasi, F. Development of adipose tissue in newborns of gestational-diabetic and insulin-dependent diabetic mothers. *Diabetes* **1980**, *29*, 100-104, doi:10.2337/diab.29.2.100.
  5. Group, N.D.D. Classification and Diagnosis of Diabetes Mellitus and Other Categories of Glucose Intolerance. *Diabetes* **1979**, *28*, 1039, doi:10.2337/diab.28.12.1039.
  6. Catalano, P.M.; Thomas, A.; Huston-Presley, L.; Amini, S.B. Increased fetal adiposity: A very sensitive marker of abnormal in utero development. *American Journal of Obstetrics and Gynecology* **2003**, *189*, 1698-1704, doi:10.1016/s0002-9378(03)00828-7.
  7. Naf, S.; Escote, X.; Yanez, R.E.; Ballesteros, M.; Simon, I.; Gil, P.; Megia, A.; Vendrell, J. Zinc-alpha2-glycoprotein is unrelated to gestational diabetes: anthropometric and metabolic determinants in pregnant women and their offspring. *PLoS One* **2012**, *7*, e47601, doi:10.1371/journal.pone.0047601.
  8. Carpenter, M.W.; Coustan, D.R. Criteria for screening tests for gestational diabetes. *American Journal of Obstetrics and Gynecology* **1982**, *144*, 768-773, doi:https://doi.org/10.1016/0002-9378(82)90349-0.
  9. Brumbaugh, D.E.; Tearse, P.; Cree-Green, M.; Fenton, L.Z.; Brown, M.; Scherzinger, A.; Reynolds, R.; Alston, M.; Hoffman, C.; Pan, Z.X., et al. Intrahepatic Fat Is Increased in the Neonatal Offspring of Obese Women with Gestational Diabetes. *Journal of Pediatrics* **2013**, *162*, 930-U977, doi:10.1016/j.jpeds.2012.11.017.
  10. Hill, J.C.; Krishnaveni, G.V.; Annamma, I.; Leary, S.D.; Fall, C.H.D. Glucose tolerance in pregnancy in South India: relationships to neonatal anthropometry. *Acta Obstetrica Et Gynecologica Scandinavica* **2005**, *84*, 159-165, doi:10.1111/j.0001-6349.2005.00670.x.
  11. Lain, K.Y.; Garabedian, M.J.; Daftary, A.; Jeyabalan, A. Neonatal adiposity following maternal treatment of gestational diabetes with glyburide compared with insulin. *American Journal of Obstetrics and Gynecology* **2009**, *200*, doi:10.1016/j.ajog.2009.02.038.
  12. Okereke, N.C.; Uvena-Celebrezze, J.; Hutson-Presley, L.; Amini, S.B.; Catalano, P.M. The effect of gender and gestational diabetes mellitus on cord leptin concentration. *Am J Obstet Gynecol* **2002**, *187*, 798-803, doi:10.1067/mob.2002.125887.
  13. Vohr, B.R.; McGarvey, S.T.; Coll, C.G. Effects of maternal gestational diabetes and adiposity on neonatal adiposity and blood pressure. *Diabetes Care* **1995**, *18*, 467-475, doi:10.2337/diacare.18.4.467.
  14. N, F. Summary and Recommendations of the Second International Workshop-Conference on Gestational Diabetes Mellitus. *Diabetes* **1985**, *34*, 123-126, doi:10.2337/diab.34.2.S123.
  15. Hollingsworth, D.R.; Vaucher, Y.; Yamamoto, T.R. Diabetes in pregnancy in Mexican Americans. *Diabetes Care* **1991**, *14*, 695-705, doi:10.2337/diacare.14.7.695.
  16. Court, D.J.; Mann, S.L.; Stone, P.R.; Goldsbury, S.M.; Dixon-McIvor, D.; Baker, J.R. Comparison of glucose polymer and glucose for screening and tolerance tests in pregnancy. *Obstet Gynecol* **1985**, *66*, 491-499.
  17. Simmons, D.; Robertson, S. Influence of maternal insulin treatment on the infants of women with gestational diabetes. *Diabet Med* **1997**, *14*, 762-765, doi:10.1002/(SICI)1096-9136(199709)14:9<762::AID-DIA485>3.0.CO;2-C.
  18. Fuhrmann, K. Gestational Diabetes, Significance of Risk Factors and Results of a Follow-up Study 8 Years After Delivery. In *Gestational Diabetes*, Weiss, P.A.M., Coustan, D.R., Eds. Springer Vienna: Vienna, 1988; 10.1007/978-3-7091-8925-2\_6pp. 93-98.
  19. Plagemann, A.; Harder, T.; Kohlhoff, R.; Rohde, W.; Dorner, G. Overweight and obesity in infants of mothers with long-term insulin-dependent diabetes or gestational diabetes. *Int J Obes Relat Metab Disord* **1997**, *21*, 451-456.
  20. Lind, T.; Phillips, P.R. Influence of pregnancy on the 75-g OGTT. A prospective multicenter study. The Diabetic Pregnancy Study Group of the European Association for the Study of Diabetes. *Diabetes* **1991**, *40 Suppl 2*, 8-13, doi:10.2337/diab.40.2.s8.
  21. Andersson-Hall, U.K.; Järvinen, E.A.J.; Bosaeus, M.H.; Gustavsson, C.E.; Hårsmar, E.J.; Niklasson, C.A.; Albertsson-Wikland, K.G.; Holmäng, A.B. Maternal obesity and gestational diabetes mellitus affect body composition through infancy: the PONCH study. *Pediatric Research* **2019**, *85*, 369-377, doi:10.1038/s41390-018-0248-9.
  22. Hoffman, L.; Nolan, C.; Wilson, J.D.; Oats, J.J.N.; Simmons, D. Gestational diabetes mellitus - management guidelines: The Australasian Diabetes in Pregnancy Society. *Medical Journal of Australia* **1998**, *169*, 93-97, doi:10.5694/j.1326-5377.1998.tb140192.x.

23. Au, C.P.; Raynes-Greenow, C.H.; Turner, R.M.; Carberry, A.E.; Jeffery, H.E. Body Composition Is Normal in Term Infants Born to Mothers With Well-Controlled Gestational Diabetes Mellitus. *Diabetes Care* **2013**, *36*, 562-564, doi:10.2337/dc12-1557.
24. Lingwood, B.E.; Henry, A.M.; d'Emden, M.C.; Fullerton, A.M.; Mortimer, R.H.; Colditz, P.B.; Le Cao, K.A.; Callaway, L.K. Determinants of Body Fat in Infants of Women With Gestational Diabetes Mellitus Differ With Fetal Sex. *Diabetes Care* **2011**, *34*, 2581-2585, doi:10.2337/dc11-0728.
25. Ng, P.C.; Lee, C.H.; Lam, C.W.; Wong, E.; Chan, I.H.; Fok, T.F. Plasma ghrelin and resistin concentrations are suppressed in infants of insulin-dependent diabetic mothers. *J Clin Endocrinol Metab* **2004**, *89*, 5563-5568, doi:10.1210/jc.2004-0736.
26. Rowan, J.A.; Hague, W.M.; Gao, W.; Battin, M.R.; Moore, M.P.; Mi, G.T.I. Metformin versus insulin for the treatment of gestational diabetes. *N Engl J Med* **2008**, *358*, 2003-2015, doi:10.1056/NEJMoa0707193.
27. Metzger, B.E.; Coustan, D.R. Summary and recommendations of the Fourth International Workshop-Conference on Gestational Diabetes Mellitus. The Organizing Committee. *Diabetes Care* **1998**, *21 Suppl 2*, B161-167.
28. Landon, M.B.; Spong, C.Y.; Thom, E.; Carpenter, M.W.; Ramin, S.M.; Casey, B.; Wapner, R.J.; Varner, M.W.; Rouse, D.J.; Thorp, J.M., Jr., et al. A multicenter, randomized trial of treatment for mild gestational diabetes. *N Engl J Med* **2009**, *361*, 1339-1348, doi:10.1056/NEJMoa0902430.
29. Salim, R.; Hasanein, J.; Nachum, Z.; Shalev, E. Anthropometric parameters in infants of gestational diabetic women with strict glycemic control. *Obstet Gynecol* **2004**, *104*, 1021-1024, doi:10.1097/01.AOG.0000143821.00194.ad.
30. Association, A.D. Gestational Diabetes Mellitus. *Diabetes Care* **2004**, *27*, S88-S90, doi:10.2337/diacare.27.2007.s88.
31. Buhling, K.J.; Doll, I.; Siebert, G.; Catalano, P.M. Relationship between sonographically estimated fetal subcutaneous adipose tissue measurements and neonatal skinfold measurements. *Ultrasound Obstet Gynecol* **2012**, *39*, 558-562, doi:10.1002/uog.10092.
32. Schaefer-Graf, U.M.; Meitzner, K.; Ortega-Senovilla, H.; Graf, K.; Vetter, K.; Abou-Dakn, M.; Herrera, E. Differences in the implications of maternal lipids on fetal metabolism and growth between gestational diabetes mellitus and control pregnancies. *Diabet Med* **2011**, *28*, 1053-1059, doi:10.1111/j.1464-5491.2011.03346.x.
33. Coustan, D.R.; Lowe, L.P.; Metzger, B.E.; Dyer, A.R. The Hyperglycemia and Adverse Pregnancy Outcome (HAPO) study: paving the way for new diagnostic criteria for gestational diabetes mellitus. *American Journal of Obstetrics and Gynecology* **2010**, *202*, 654.e651-654.e656, doi:10.1016/j.ajog.2010.04.006.
34. Maple-Brown, L.; Lee, I.L.; Longmore, D.; Barzi, F.; Connors, C.; Boyle, J.A.; Moore, E.; Whitbread, C.; Kirkwood, M.; Graham, S., et al. Pregnancy And Neonatal Diabetes Outcomes in Remote Australia: the PANDORA study-an observational birth cohort. *Int J Epidemiol* **2019**, *48*, 307-318, doi:10.1093/ije/dyy245.
35. Mitanchez, D.; Jacqueminet, S.; Nizard, J.; Tanguy, M.L.; Ciangura, C.; Lacorte, J.M.; De Carne, C.; L'Helias, L.F.; Chavatte-Palmer, P.; Charles, M.A., et al. Effect of maternal obesity on birthweight and neonatal fat mass: A prospective clinical trial. *Plos One* **2017**, *12*, doi:10.1371/journal.pone.0181307.
36. Prentice, P.M.; Olga, L.; Petry, C.J.; Simmons, D.; Murphy, H.R.; Hughes, I.A.; Acerini, C.L.; Ong, K.K.; Dunger, D.B. Reduced size at birth and persisting reductions in adiposity in recent, compared with earlier, cohorts of infants born to mothers with gestational diabetes mellitus. *Diabetologia* **2019**, *62*, 1977-1987, doi:10.1007/s00125-019-4970-6.
37. Uebel, K.; Pusch, K.; Gedrich, K.; Schneider, K.T.; Hauner, H.; Bader, B.L. Effect of maternal obesity with and without gestational diabetes on offspring subcutaneous and preperitoneal adipose tissue development from birth up to year-1. *BMC Pregnancy Childbirth* **2014**, *14*, 138, doi:10.1186/1471-2393-14-138.
38. World Health Organization. Diagnostic criteria and classification of hyperglycaemia first detected in pregnancy: a World Health Organization Guideline. *Diabetes Res Clin Pract* **2014**, *103*, 341-363, doi:10.1016/j.diabres.2013.10.012.
39. Kara, M.; Orbak, Z.; Doneray, H.; Ozkan, B.; Akcay, F. The Relationship Between Skinfold Thickness and Leptin, Ghrelin, Adiponectin, and Resistin Levels in Infants of Diabetic Mothers. *Fetal Pediatr Pathol* **2017**, *36*, 1-7, doi:10.1080/15513815.2016.1217960.
